# Supplementary material for: ZGSO Spinel Nanoparticles with Dual Emission of NIR Persistent Luminescence for Anti-Counterfeiting Applications
Source: MDPI journal article supplement (doi:10.3390/ma16031132), 2023-01-28
Supplement: s1 [file s1]

*Article*

# **ZGSO Spinel Nanoparticles with Multi-Emission of NIR Persistent Luminescence for Anticounterfeiting Applications**

Guanyu Cai <sup>1,2</sup>, Teresa Delgado <sup>1</sup>, **Cyrille Richard <sup>2,\*</sup>**, **Bruno Viana <sup>1,\*</sup>**

<sup>1</sup> Université PSL, Chimie ParisTech, CNRS, IRCP, 75005 Paris, France

<sup>2</sup> Université Paris Cité, CNRS, INSERM, UTCBS, Unité de Technologies Chimiques et Biologiques pour la Santé, Faculté de Pharmacie, 75006 Paris, France

\* Corresponding authors: [bruno.viana@chimieparistech.psl.eu](mailto:bruno.viana@chimieparistech.psl.eu); [cyrille.richard@u-paris.fr](mailto:cyrille.richard@u-paris.fr)

Table S1 : Names and formulas of the Ni<sup>2+</sup> doped ZGSO samples

|                                                 |                                                                                              |
|-------------------------------------------------|----------------------------------------------------------------------------------------------|
| ZGSO-0:Ni <sup>2+</sup> (ZGO:Ni <sup>2+</sup> ) | ZnGa <sub>1.99</sub> Ni <sub>0.01</sub> O <sub>3.995</sub>                                   |
| ZGSO-1:Ni <sup>2+</sup>                         | Zn <sub>1.1</sub> Ga <sub>1.79</sub> Ni <sub>0.01</sub> Sn <sub>0.1</sub> O <sub>3.995</sub> |
| ZGSO-2:Ni <sup>2+</sup>                         | Zn <sub>1.2</sub> Ga <sub>1.59</sub> Ni <sub>0.01</sub> Sn <sub>0.2</sub> O <sub>3.995</sub> |
| ZGSO-3:Ni <sup>2+</sup>                         | Zn <sub>1.3</sub> Ga <sub>1.39</sub> Ni <sub>0.01</sub> Sn <sub>0.3</sub> O <sub>3.995</sub> |
| ZGSO-4:Ni <sup>2+</sup>                         | Zn <sub>1.4</sub> Ga <sub>1.19</sub> Ni <sub>0.01</sub> Sn <sub>0.4</sub> O <sub>3.995</sub> |
| ZGSO-5:Ni <sup>2+</sup>                         | Zn <sub>1.5</sub> Ga <sub>0.09</sub> Ni <sub>0.01</sub> Sn <sub>0.5</sub> O <sub>3.995</sub> |
| ZGSO-6:Ni <sup>2+</sup>                         | Zn <sub>1.6</sub> Ga <sub>0.79</sub> Ni <sub>0.01</sub> Sn <sub>0.6</sub> O <sub>3.995</sub> |

Table S2 : Names and formulas of the co-doped ZGSO samples

|                                                             |                                                                                                                                    |
|-------------------------------------------------------------|------------------------------------------------------------------------------------------------------------------------------------|
| ZGSO-3:Ni <sup>2+</sup> ,Er <sup>3+</sup>                   | Zn <sub>1.3</sub> Ga <sub>1.38</sub> Ni <sub>0.01</sub> Er <sub>0.01</sub> Sn <sub>0.3</sub> O <sub>3.995</sub>                    |
| ZGSO-3:Er <sup>3+</sup> ,Cr <sup>3+</sup>                   | Zn <sub>1.3</sub> Ga <sub>1.38</sub> Er <sub>0.01</sub> Cr <sub>0.01</sub> Sn <sub>0.3</sub> O <sub>4</sub>                        |
| ZGSO-3:Ni <sup>2+</sup> ,Er <sup>3+</sup> ,Cr <sup>3+</sup> | Zn <sub>1.3</sub> Ga <sub>1.37</sub> Ni <sub>0.01</sub> Er <sub>0.01</sub> Cr <sub>0.01</sub> Sn <sub>0.3</sub> O <sub>3.995</sub> |

Table S3: Name and formula of the Cr<sup>3+</sup> doped ZGSO sample (no Ni<sup>2+</sup> and no Er<sup>3+</sup>)

|                         |                                                                                          |
|-------------------------|------------------------------------------------------------------------------------------|
| ZGSO-3:Cr <sup>3+</sup> | Zn <sub>1.3</sub> Ga <sub>1.39</sub> Cr <sub>0.01</sub> Sn <sub>0.3</sub> O <sub>4</sub> |
|-------------------------|------------------------------------------------------------------------------------------|

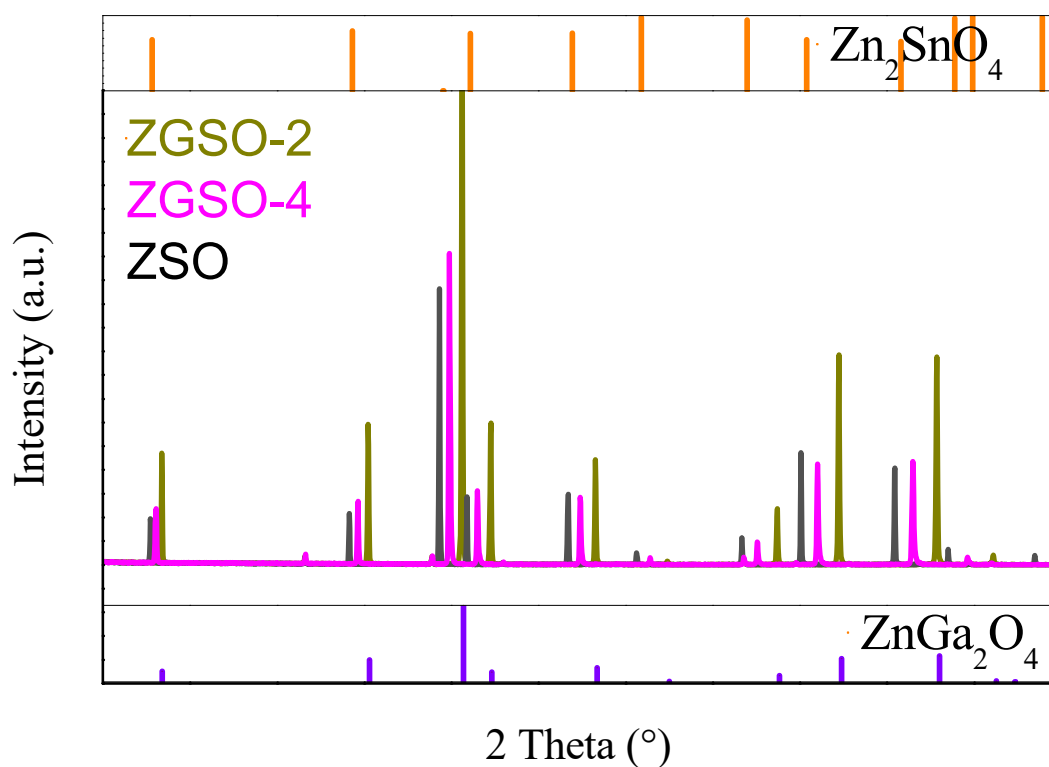

Figure S1 : XRD patterns of 0.5% Ni<sup>2+</sup> doped ZGSO-2, ZGSO-4 and ZSO samples. With the increasing Sn<sup>4+</sup> content, the normal spinel is kept until very high tin content but there is a shift observed in relation to the difference in cationic sizes (see main text).

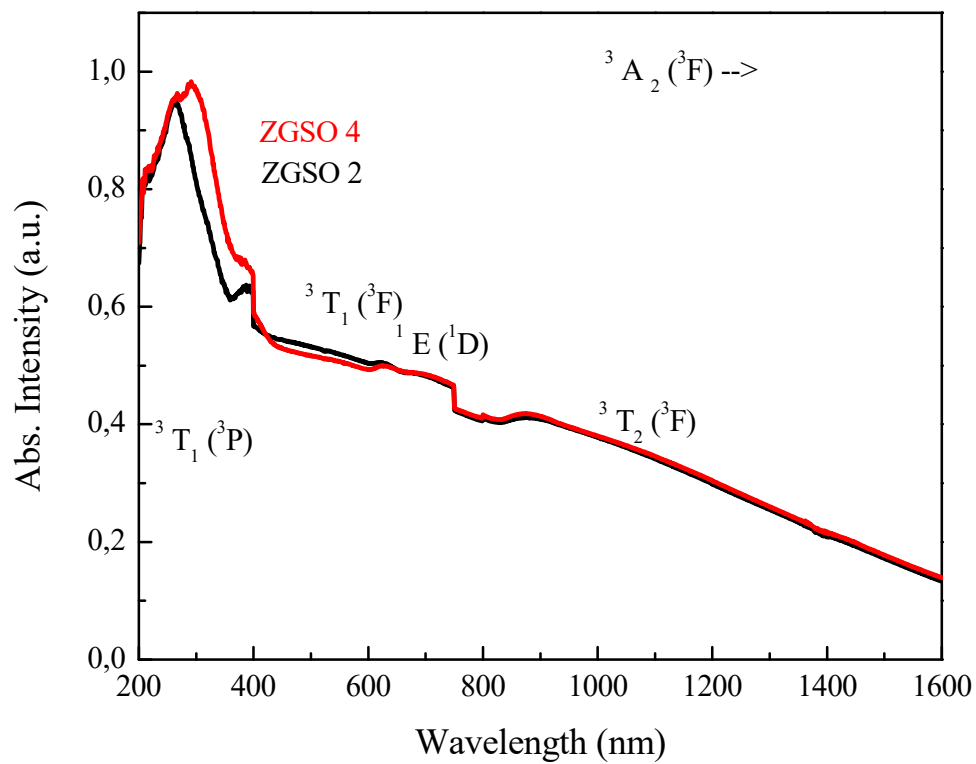

**Figure S2** : Normalized absorption spectra of 0.5%  $\text{Ni}^{2+}$  doped ZGSO-2 and ZGSO-4 samples. At this very low doping content, the  $\text{Ni}^{2+}$  absorption variation is barely observed while the main effect is the tin variation of the host insuring energy bandgap variation (see main text).

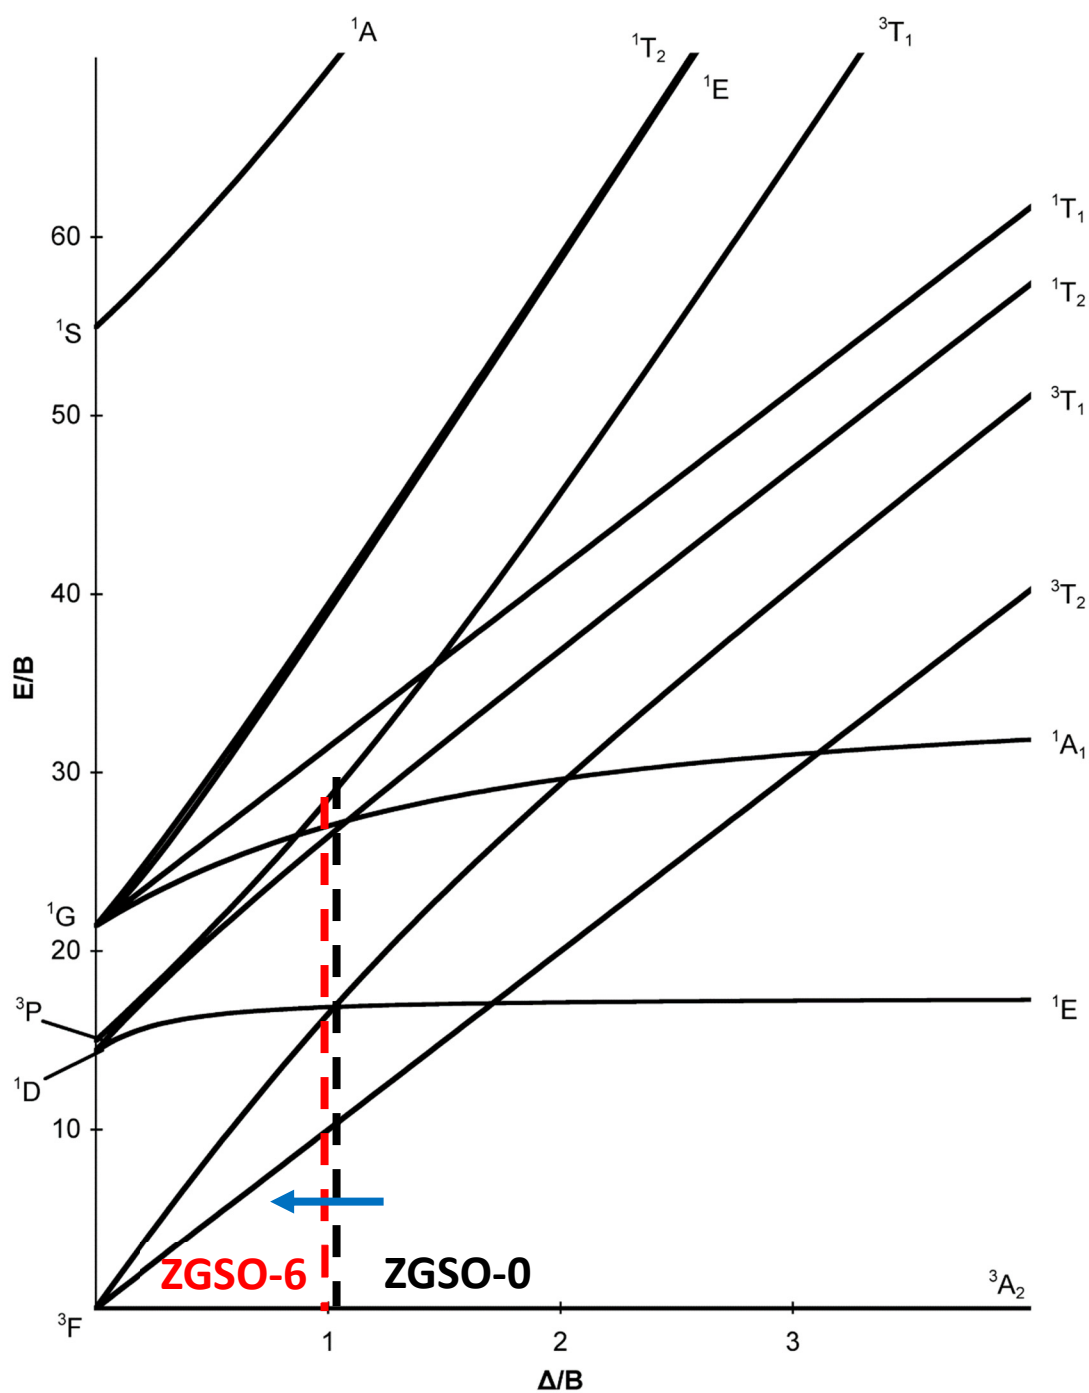

**Figure S3** : Tanabe-Sugano diagram of  $\text{Ni}^{2+}$  ( $d^8$  configuration) in the complex spinel samples of ZGSO-0 ( $\text{ZnGa}_2\text{O}_4:0.5\%\text{Ni}^{2+}$ ) and ZGSO-6 ( $\text{Zn}_{1.6}\text{Ga}_{0.8}\text{Sn}_{0.6}\text{O}_4:0.5\%\text{Ni}^{2+}$ ) corresponding to different  $\text{Sn}^{4+}$  concentrations.

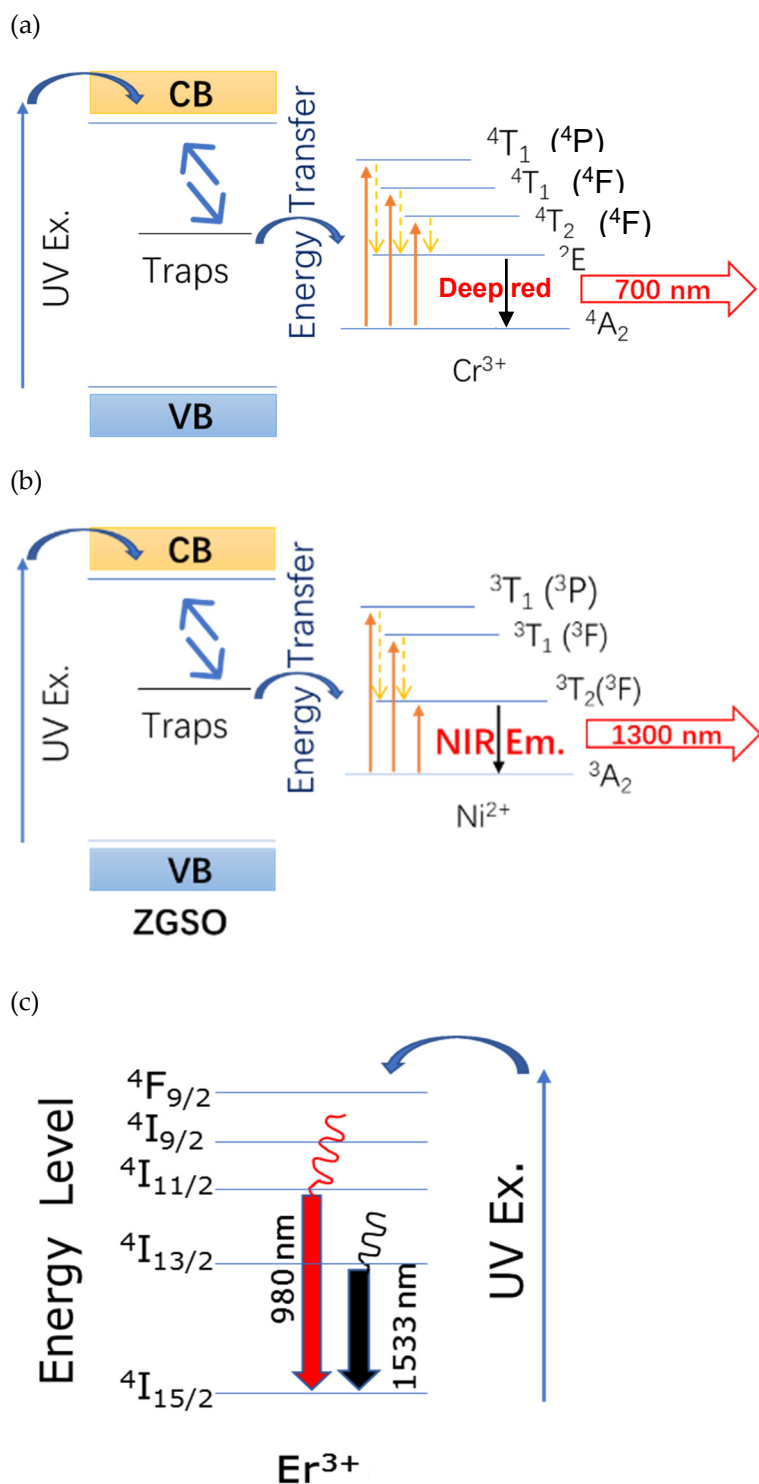

**Figure S4** : Schematic diagrams of the absorption/emission bands; trapping/detrapping and energy transfer mechanisms leading to deep red emission of (a) ZGSO-3:Cr<sup>3+</sup> NPs, and NIR emission of (b) ZGSO-3:Ni<sup>2+</sup> NPs, and 4f-4f transition of (c) ZGSO-3:Er<sup>3+</sup> NPs.

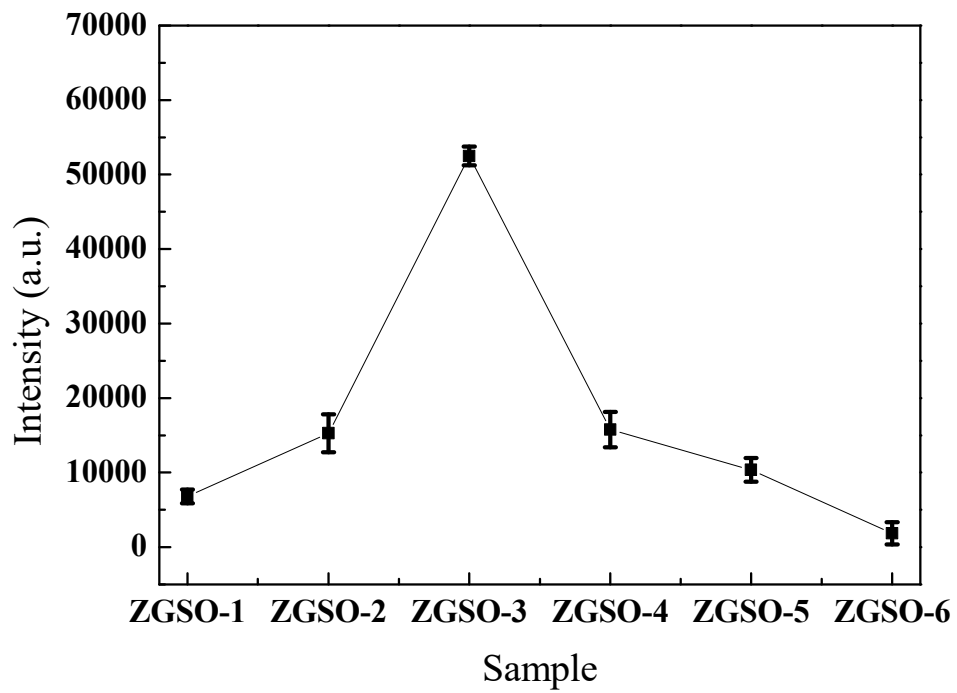

Figure S5 : ~~Persistent luminescence~~ ~~Persist. Lum.~~ intensity of Ni<sup>2+</sup> doped ZGSO-0 –ZGSO-6 samples (detection 1 min after cutting off the 365 nm UV lamp excitation). Same quantity of powder and same excitation time is used for all samples. Detection with InGaAs camera.

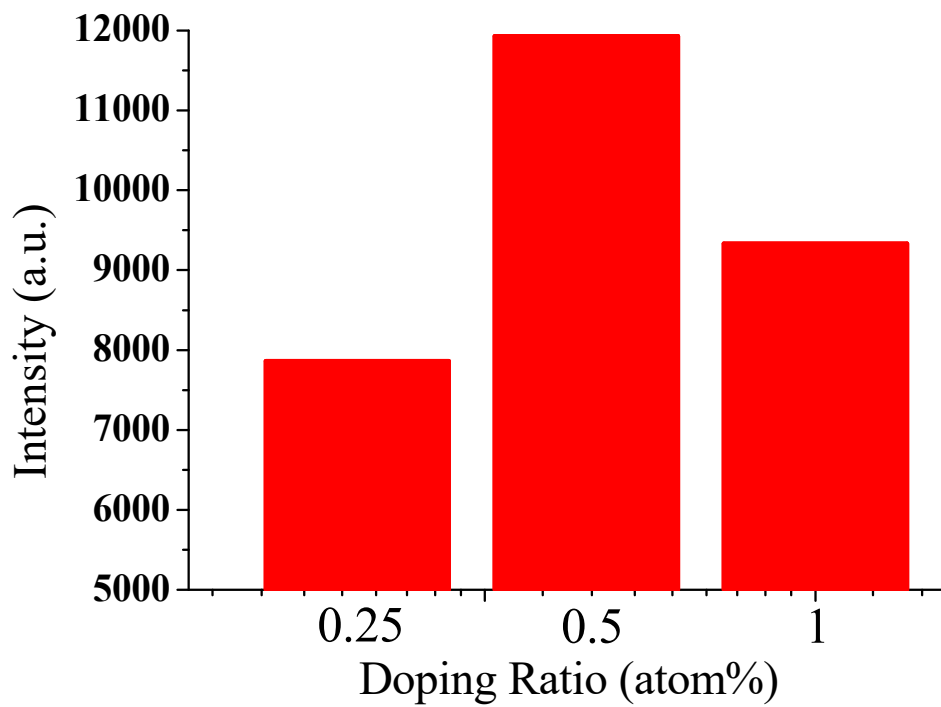

Figure S6 : ~~Persistent luminescence~~ ~~Persist. Lum.~~ intensity of the Ni<sup>2+</sup> doped ZGSO-3 for three nominal different doping concentrations, namely 0.25%, 0.5% and 1%. (detection with the InGaAs camera, 1 min after cutting off the 365 nm UV lamp excitation).

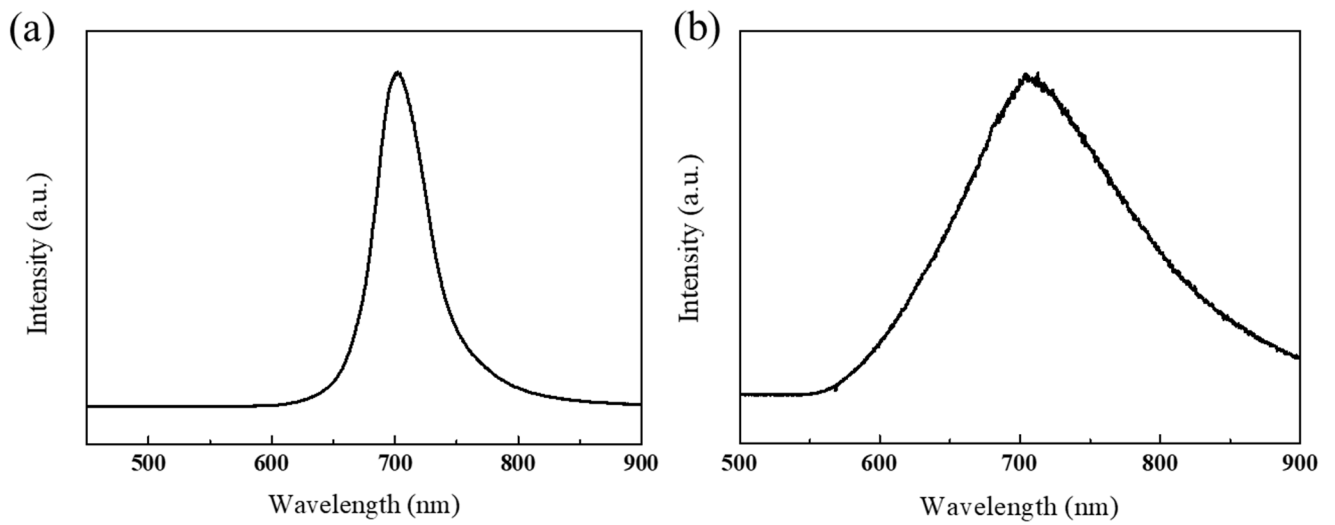

Figure S7 : Persistent luminescence ~~Persist. Lum.~~ spectra of (a) ZGSO-3:Cr<sup>3+</sup> and (b) ZGSO-3:Er<sup>3+</sup>, Cr<sup>3+</sup>, respectively. (detection with the Si-camera 1min after removal of UV lamp excitation (365nm, 5 min). No persistent emission from Er<sup>3+</sup> is observed.



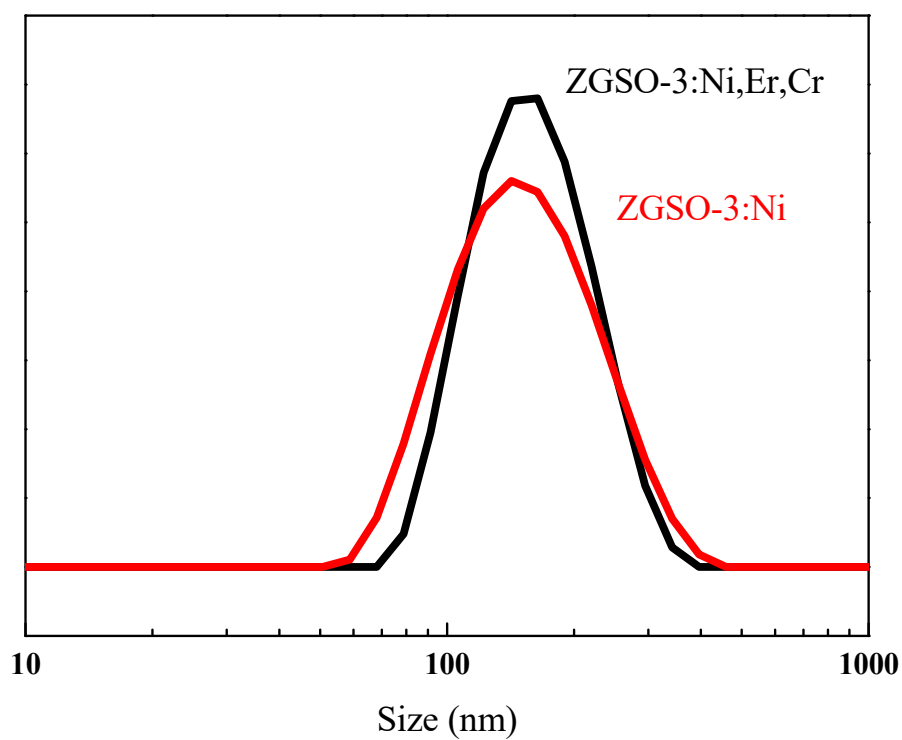

Figure S8 : Nanoparticles size measurements of ZGSO-3:Ni<sup>2+</sup> and ZGSO-3:Ni<sup>2+</sup>,Er<sup>3+</sup>,Cr<sup>3+</sup> samples obtained by DLS.

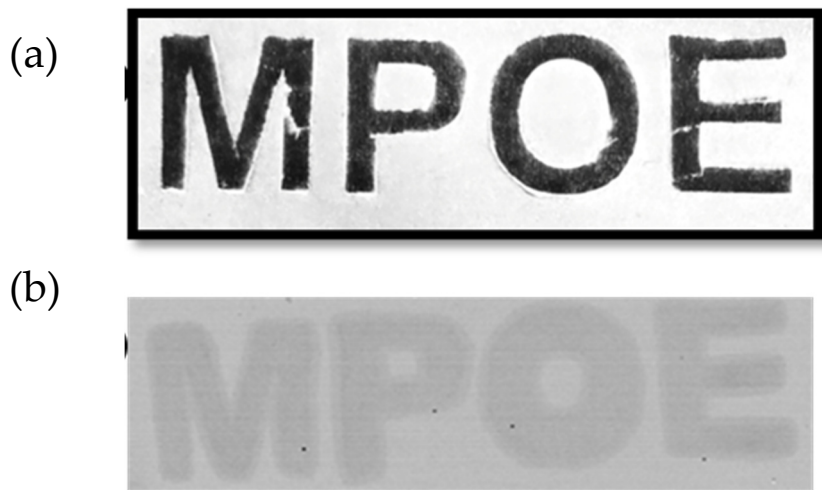

**Figure S9** : (a) Image of the “MPOE” pattern templated by hand, and filled using ZGSO-3:Ni<sup>2+</sup>,Er<sup>3+</sup>,Cr<sup>3+</sup> NPs, detected by the Si-camera (b) PL image recorded from the “MPOE” pattern using ZGSO-3: Ni<sup>2+</sup>,Er<sup>3+</sup>,Cr<sup>3+</sup> NPs under UV excitation, detected by InGaAs-based NIR camera with minimum contrast to avoid saturation.

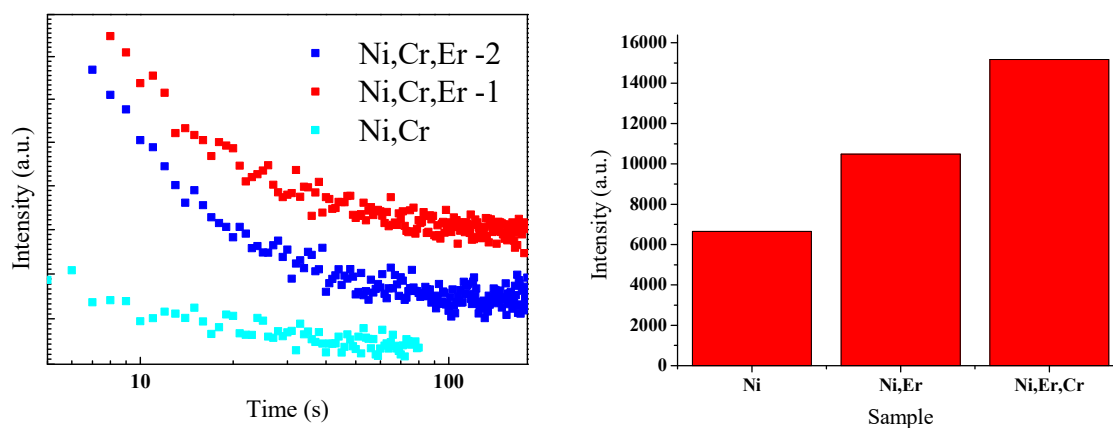

Figure S10. a) Decay of persistent luminescence of the three samples (ZGSO:Ni ; ZGSO:Ni,Er ; ZGSO:Ni,Er,Cr) measured with the InGaAs camera. b) Intensity of NIR persistent luminescence at 1300 nm of three samples (ZGSO:Ni ; ZGSO:Ni,Er ; ZGSO:Ni,Er,Cr). The detection of the persistent luminescence of all the samples started 1 min after cutting off the 365 nm UV lamp excitation. Same experimental conditions for the 3 samples.

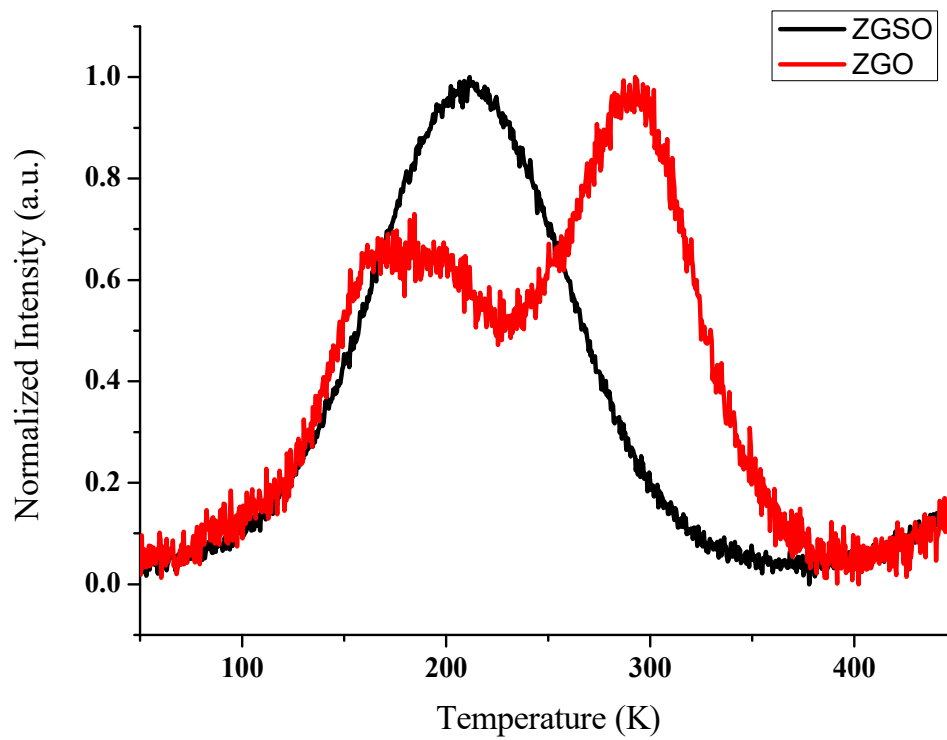

Figure S11: Normalized thermoluminescence glow curves of ZGSO:Ni and ZGO:Ni as obtained after 365 nm UV excitation during 5 minutes at 14 K (the emission wavelength is ~ 1300 nm. ).
